# Supplementary material for: Anatomy, taphonomy, and phylogenetic implications of a new specimen of Eolambia caroljonesa (Dinosauria: Ornithopoda) from the Cedar Mountain Formation, Utah, USA
Source: PLoS One. 2017 May 10;12(5):e0176896. doi: 10.1371/journal.pone.0176896 (PMC5425030; doi:10.1371/journal.pone.0176896)
Supplement: S1 Spreadsheet — Character-taxon matrix used in the phylogenetic analysis. (XLS) [file pone.0176896.s001.xls]

## Sheet: Sheet1
S1 Spreadsheet. Data Matrix.
Character	0	1	2	3		4	5	6	7	8	9	10	11	12	13	14	15	16	17	18	19		20	21	22	23	24		25	26	27	28	29	30	31		32	33	34	35	36	37	38	39	40		41	42	43
Taxon	PD1	PD2	PD3	PD4		DT1	DT2	DT3	DT4	DT5	DT6	DT7	DT8	DT9	DT10	DT11	DT12	DT13	DT14	DT15	DT16		SU1	SU2	SU3	SU4	ANG1		PM1	PM2	PM3	PM4	PM5	PM6	PM7		MX1	MX2	MX3	MX4	MX5	MX6	MX7	MX8	MX9		LAC1	LAC2	LAC3
Camptosaurus dispar	0	0	0	0		0	0	0	0	0	0	0	0	0	0	0	0	0	0	?	?		?	?	?	?	?		0	0	0	?	0	0	0		0	0	0	0	0	0	0	0	?		?	?	?
Iguanacolossus fortis	0	?	0	?		?	?	?	?	?	?	?	?	?	?	?	?	?	?	?	?		?	?	?	?	?		?	?	?	?	?	?	?		?	?	1	0	0	0	1	0	?		?	?	?
Hippodraco scutodens	?	?	?	?		?	?	0	0	0	?	?	0	0	0	0	0	0	0	?	?		0	0	0	0	0		?	?	?	0	?	?	?		?	?	0	0	?	0	1	0	?		0	1	0
Theiophytalia kerri	?	?	?	?		?	?	?	?	?	?	?	?	?	0	0	0	0	0	?	?		0	0	0	0	0		0	0	1	0	0	0	0		0	1	?	?	?	0	1	0	?		0	1	0
Dakotadon lakotaensis	0	1	?	0		0	0	0	0	?	0	?	0	0	?	?	?	?	?	?	?		?	?	?	?	?		0	0	1	0	0	0	0		0	1	1	0	0	0	1	0	?		0	0	0
Lanzhousaurus magnidens	?	?	?	?		0	0	0	0	0	0	1	0	0	0	1	0	0	0	?	?		0	0	0	0	0		?	?	?	?	?	?	?		?	?	?	?	?	?	?	?	?		?	?	?
Lurdusaurus arenatus	0	?	?	?		?	?	?	?	?	?	?	?	?	?	?	?	?	?	?	?		0	0	0	0	0		?	0	?	?	?	?	?		?	?	?	?	?	?	?	?	?		?	?	?
Fukuisaurus tetoriensis	1	0	0	1		0	0	0	0	?	0	1	0	2	0	1	0	1	1	0	0		0	0	1	1	0		0	0	1	?	0	?	1		0	?	1	1	?	0	3	0	?		?	?	?
Barilium dawsoni	?	?	?	?		0	1	0	0	0	0	?	0	0	0	1	?	1	1	0	0		?	?	?	?	?		?	?	?	?	?	?	?		?	?	?	?	?	?	?	?	?		?	?	?
Hypselospinus fittoni	?	?	?	?		0	1	0	0	0	0	1	0	1	0	1	0	1	1	0	0		?	?	?	?	?		?	?	?	?	?	?	?		?	?	?	?	?	?	?	?	?		?	?	?
Iguanodon bernissartensis	0	1	0	0		0	1	0	0	0	0	1	0	1	0	1	0	1	1	0	0		0	1	0	1	0		0	0	1	0	0	1	1		?	1	1	0	0	1	2	1	?		0	1	1
Mantellisaurus atherfieldensis	0	1	0	0		0	1	0	0	0	0	1	0	1	1	1	0	1	1	0	0		0	1	0	1	0		0	0	1	0	0	1	1		1	1	1	1	0	1	2	1	0		0	1	1
Delapparentia turolensis	?	?	?	?		?	?	?	?	?	0	?	?	?	?	?	?	?	?	?	?		?	?	?	?	?		?	?	?	?	?	?	?		?	?	?	?	?	?	?	?	?		?	?	?
Morelladon beltrani	?	?	?	?		?	?	?	?	?	?	?	?	?	?	?	?	?	?	?	?		?	?	?	?	?		?	?	?	?	?	?	?		?	?	?	?	?	?	?	?	?		?	?	?
Proa valdearinnoensis	1	0	0	1		0	1	0	1	0	0	2	0	1	0	1	1	1	1	1	0		?	?	1	?	1		0	0	1	?	0	1	1		1	1	1	1	2	1	2	0	0		?	?	?
Ouranosaurus nigeriensis	2	1	0	1		1	1	0	0	0	0	1	1	0	1	1	1	0	1	0	0		0	0	0	1	0		1	0	1	1	1	1	1		1	?	1	1	2	1	2	1	0		0	1	1
Sirindhorna khoratensis	0	0	1	1		0	1	0	0	0	0	1	0	0	1	1	1	1	1	1	0		0	?	1	?	0		0	0	1	?	0	?	1		1	1	1	1	2	1	3	1	1		?	?	?
Koshisaurus katsuyama	?	?	?	?		?	?	?	?	?	?	?	?	?	?	?	?	?	?	?	?		?	?	?	?	?		?	?	?	?	?	?	?		1	1	1	1	?	1	2	1	1		?	?	?
Altirhinus kurzanovi	0	1	1	1		?	1	?	0	?	0	1	0	1	0	1	1	1	1	1	0		0	0	0	1	0		0	0	1	1	0	1	1		1	1	1	?	?	1	3	1	0		1	1	1
Jinzhousaurus yangi	0	?	?	1		?	1	?	0	?	?	?	0	0	1	1	?	1	1	?	?		0	1	0	1	0		?	?	?	1	?	1	1		?	1	0	?	?	1	3	?	?		1	?	1
Bolong yixianensis	?	?	?	1		?	1	?	0	?	?	1	0	0	1	1	?	0	1	0	0		?	?	?	?	?		0	0	1	1	1	1	1		1	1	0	?	?	1	3	0	0		1	1	1
Gongpoquansaurus mazongshanensis	?	?	?	?		?	?	?	?	?	?	?	?	?	?	?	?	?	?	?	?		?	?	?	?	?		?	?	?	?	?	?	?		?	?	?	?	?	?	?	?	?		?	?	?
Equijubus normani	?	?	0	1		0	1	?	0	?	?	?	0	1	1	1	?	1	1	1	0		0	1	1	1	0		0	0	1	0	0	1	1		?	1	1	?	?	1	3	?	?		1	0	1
Jintasaurus meniscus	?	?	?	?		?	?	?	?	?	?	?	?	?	?	?	?	?	?	?	?		?	?	?	?	?		?	?	?	?	?	?	?		?	?	?	?	?	?	?	?	?		?	?	?
Xuwulong yueluni	0	1	?	1		0	1	?	0	?	?	?	0	0	1	1	?	1	1	?	?		0	1	1	1	0		0	0	1	0	1	1	1		1	1	0	1	?	1	3	?	0		1	0	1
Probactrosaurus gobiensis	0	1	0	1		0	1	0	0	0	1	1	0	1	1	1	1	1	1	1	0		0	?	1	?	0		0	0	1	1	0	1	1		?	?	1	?	?	1	?	0	?		?	?	?
Eolambia caroljonesa	0	1	0	1		0	1	0	0	0	1	1	1	1	1	1	1	1	1	0	0		0	1	1	1	0		0	0	1	1	0	1	1		1	1	1	1	0	1	3	0	1		?	?	?
Protohadros byrdi	0	1	0	?		1	1	0	0	0	1	1	1	1	1	1	1	1	1	0	0		0	1	1	1	0		0	0	1	?	0	1	1		1	1	0	1	0	1	3	0	1		?	?	?
Jeyawati rugoculus	0	?	?	?		0	1	0	0	0	1	1	0	1	1	1	1	1	1	0	0		?	?	?	?	?		?	?	?	?	?	?	?		?	?	0	2	1	1	3	0	?		?	?	?
Shuangmiaosaurus gilmorei	?	?	?	?		0	1	1	1	1	1	1	0	1	0	1	1	0	1	1	0		?	?	?	?	?		?	?	?	1	?	?	?		1	1	1	?	?	2	3	0	?		1	?	?
Nanningosaurus dashiensis	?	?	?	?		?	?	?	0	?	1	1	0	?	?	?	?	1	1	1	0		?	?	?	?	?		?	?	?	?	?	?	?		1	1	0	?	?	2	3	0	?		?	?	?
Yunganglong datongensis	?	?	?	?		?	?	?	?	?	?	?	?	?	?	?	?	?	?	?	?		?	?	?	?	?		?	?	?	?	?	?	?		?	?	?	?	?	?	?	?	?		?	?	?
Levnesovia transoxiana	0	?	0	1		0	1	0	0	0	1	1	0	1	?	1	1	1	?	?	?		1	?	?	?	0		?	?	?	?	?	?	?		?	?	0	?	?	2	3	0	?		?	?	?
Bactrosaurus johnsoni	0	1	0	2		0	1	1	0	1	1	1	1	1	0	1	1	1	1	1	0		1	?	1	?	0		1	0	2	1	1	1	1		1	1	0	1	2	2	3	0	1		1	0	1
Gilmoreosaurus mongoliensis	0	1	0	1		0	?	?	0	?	?	?	0	1	?	?	?	?	?	?	?		?	?	?	?	?		?	?	?	?	?	?	?		1	?	0	2	2	2	3	0	?		1	0	1
Nanyangosaurus zhugeii	?	?	?	?		?	?	?	?	?	?	?	?	?	?	?	?	?	?	?	?		?	?	?	?	?		?	?	?	?	?	?	?		?	?	?	?	?	?	?	?	?		?	?	?
Zhanghenglong yangchengensis	?	?	?	?		0	1	1	1	1	?	1	0	1	0	1	1	1	?	?	?		?	?	?	?	?		?	?	?	?	?	?	?		1	1	1	2	?	2	3	0	1		?	?	?
Tanius sinensis	?	?	?	?		?	?	?	?	?	?	?	?	?	?	?	?	?	?	?	?		?	?	?	?	?		?	?	?	?	?	?	?		?	?	?	?	?	?	?	?	?		?	?	?
Batyrosaurus rozhdestvenskyi	1	0	1	1		?	?	0	0	0	0	?	1	1	0	1	?	0	1	0	0		0	?	1	?	0		?	?	?	?	?	?	?		?	?	?	?	?	?	?	?	?		?	?	?
Plesiohadros djadokhtaensis	0	1	0	2		0	1	1	1	1	1	1	0	0	?	1	1	0	1	1	0		?	?	?	?	1		0	0	2	?	1	?	?		1	1	1	?	?	2	3	0	1		?	?	?
Tethyshadros insularis	?	?	0	1		?	?	?	0	?	?	?	0	1	1	1	1	2	1	?	?		1	1	1	1	1		1	0	2	1	?	1	1		?	0	0	?	?	2	3	?	?		1	0	1
Telmatosaurus transsylvanicus	?	?	?	?		1	1	1	0	1	1	1	0	1	1	1	1	2	1	1	0		1	?	1	1	1		1	0	2	1	1	1	1		1	1	0	1	2	2	3	0	?		?	?	?
Huehuecanauhtlus tiquichensis	?	?	?	?		?	?	?	?	?	?	?	?	?	?	?	?	?	?	?	?		?	?	?	?	?		?	?	?	?	?	?	?		?	?	?	?	?	2	3	?	?		?	?	?
Claosaurus agilis	?	?	?	?		?	?	?	?	?	1	?	?	?	?	?	?	?	?	?	?		?	?	?	?	?		?	?	?	?	?	?	?		?	?	?	?	?	2	?	?	?		?	?	?
Hadrosaurus foulkii	?	?	?	?		?	?	?	?	?	1	?	?	?	?	?	?	?	?	?	?		?	?	?	?	?		?	?	?	?	?	?	?		?	?	?	?	?	2	?	?	?		?	?	?
Edmontosaurus annectens	2	1	0	2		1	1	1	0	1	1	2	0	1	1	1	1	2	1	1	1		1	1	1	1	1		1	1	2	1	1	1	1		1	0	0	2	2	2	3	0	1		1	0	1
Corythosaurus casuarius	2	1	0	2		1	1	1	0	1	1	2	0	1	1	1	1	2	1	1	1		1	1	1	1	1		1	1	2	1	1	1	1		?	1	0	?	?	2	3	0	?		1	0	1
[truncated: 91 more columns]
