# Supplementary material for: Anatomy, taphonomy, and phylogenetic implications of a new specimen of Eolambia caroljonesa (Dinosauria: Ornithopoda) from the Cedar Mountain Formation, Utah, USA
Source: PLoS One. 2017 May 10;12(5):e0176896. doi: 10.1371/journal.pone.0176896 (PMC5425030; doi:10.1371/journal.pone.0176896)
Supplement: S2 Spreadsheet — Iguanodontian specimens examined firsthand. (XLS) [file pone.0176896.s002.xls]

## Sheet: Sheet1
S2 Spreadsheet. Taxa, Specimens, and References Used in the Phylogenetic Analysis of Iguanodontia.
Taxa	Specimens Examined Firsthand	References Used
Camptosaurus dispar	YPM 1856A, 1877 (holotype), 1878 (paratype), 1880, 1886, 1888, 7334, 7416, 7417, 7419, 7426, 8611, 8619, 8620, 8622, PU14553; USNM 2210, 4277, 4281, 4282, 4697, 5473, 5818, 5819, 5821, 5825, 5954, 5955, 5959, 5961, 5996, 5997, 5998, 7421, 7631; AMNH 6120	Gilmore 1909; McDonald 2011
Iguanacolossus fortis	UMNH VP 20205 (holotype)	McDonald et al. 2010b
Hippodraco scutodens	UMNH VP 20208 (holotype)	McDonald et al. 2010b
Theiophytalia kerri	YPM 1887 (holotype)	Brill and Carpenter 2006
Dakotadon lakotaensis	SDSM 8656 (holotype)	Weishampel and Bjork 1989; Boyd and Pagnac 2015
Lanzhousaurus magnidens		You et al. 2005
Lurdusaurus arenatus	MNHN GDF 1700 (holotype)	Taquet and Russell 1999
Fukuisaurus tetoriensis		Kobayashi and Azuma 2003; Carpenter and Ishida 2010; Shibata and Azuma 2015
Barilium dawsoni	Syntype specimens pertaining to a single individual (NHMUK R798, R799, R802, R4771), NHMUK R3788, R4743, R4746, 28660 (holotype of "Kukufeldia tilgatensis")	Norman 2010, 2011, 2012
Hypselospinus fittoni	NHMUK R1635 (holotype), R1831-1833 (single individual), R1834, syntype specimens of "Iguanodon hollingtoniensis" (R1148, R1629, R1632), specimens referred to "I. hollingtoniensis" (R604, R811)	Norman 2010, 2012, 2014
Iguanodon bernissartensis	IRSNB 1534 (lectotype), 1536, 1561, 1639; syntype specimens of "Iguanodon seelyi" pertaining to a single individual (NHMUK R2502, R2503, R2506, R2507); NHMUK R5162, R5331; MIWG 1997.55	Norman 1980, 2012
Mantellisaurus atherfieldensis	NHMUK R5764 (holotype), R11521, R3741; IRSNB 1551; MIWG 6344	Hooley 1925; Norman 1986, 1993, 2012; McDonald 2012
Delapparentia turolensis		Ruiz-Omeñaca 2011; Gasca et al. 2014, 2015
Morelladon beltrani		Gasulla et al. 2015
Proa valdearinnoensis		McDonald et al. 2012b; Verdú et al. 2015
Ouranosaurus nigeriensis	Casts of holotype MNHN GDF 300	Taquet 1976
Sirindhorna khoratensis		Shibata et al. 2015
Koshisaurus katsuyama		Shibata and Azuma 2015
Altirhinus kurzanovi		Norman 1998
Jinzhousaurus yangi		Barrett et al. 2009; Wang et al. 2011
Bolong yixianensis		Wu and Godefroit 2012; Zheng et al. 2014
Gongpoquansaurus mazongshanensis		Lu 1997; You et al. 2014
Equijubus normani	IVPP V 12534 (holotype)	You et al. 2003b; McDonald et al. 2014
Jintasaurus meniscus		You and Li 2009
Xuwulong yueluni		You et al. 2011
Probactrosaurus gobiensis	IRSNB specimens	Norman 2002
Eolambia caroljonesa	CEUM 9758 (holotype), 5212 (paratype), additional CEUM specimens from Eolambia #2 bonebed and Willow Springs 8 bonebed; FMNH PR 3847	Kirkland 1998; Head 2001; McDonald et al. 2012a; this paper
Protohadros byrdi	SMU 74582 (holotype)	Head 1998
Jeyawati rugoculus	MSM P4166 (holotype)	McDonald et al. 2010a
Shuangmiaosaurus gilmorei		You et al. 2003a
Nanningosaurus dashiensis		Mo et al. 2007
Yunganglong datongensis		Wang et al. 2013
Levnesovia transoxiana		Sues and Averianov 2009
Bactrosaurus johnsoni	AMNH 6365, 6366, 6372, 6386, 6396, 6553 (holotype), 6575, 6577; IRSNB casts; YPM 5767 (cast of PIN 2549/1)	Gilmore 1933; Godefroit et al. 1998
Gilmoreosaurus mongoliensis	AMNH 6369 and specimens formerly catalogued under the number AMNH 6551 (AMNH FARB 30653, 30654, 30655, 30657, 30658, 30659, 30671, 30722, 30725, 30727, 30728, 30736, 30738, 30769)	Gilmore 1933; Prieto-Márquez and Norell 2010
Nanyangosaurus zhugeii		Xu et al. 2000
Zhanghenglong yangchengensis		Xing et al. 2014
Tanius sinensis		Wiman 1929
Batyrosaurus rozhdestvenskyi		Godefroit et al. 2012
Plesiohadros djadokhtaensis		Tsogtbaatar et al. 2014
Tethyshadros insularis		Dalla Vecchia 2009b
Telmatosaurus transsylvanicus	NHMUK R3386 (lectotype), R3387, R3388, R3841	Weishampel et al. 1993; Dalla Vecchia 2009a
Huehuecanauhtlus tiquichensis		Ramírez-Velasco et al. 2012
Claosaurus agilis	YPM 1190 (holotype)	Carpenter et al. 1995
Hadrosaurus foulkii	Syntype specimens pertaining to a single individual (ANSP 9201, 9202, 9203, 9204, 10005)	Prieto-Márquez et al. 2006a; Prieto-Márquez 2011
Edmontosaurus annectens	USNM 2413, 3814, 4737, 4807, 4809, 5839, 22102; YPM 2182 (paratype); DMNS 1493; AMNH 427, 5046, 5730, 5879, 5886	Campione and Evans 2011; Prieto-Márquez 2014
Corythosaurus casuarius	AMNH 5240 (holotype), 5338 (paratype), 5359, 5433; CM 9461; USNM 15493	Brown 1914, 1916; Ostrom 1961
